# Supplementary material for: 1H, 13C and 15N resonance assignments for human all-Ala α-lactalbumin in its molten globule and urea-denatured states
Source: Springer Nature journal article supplement (doi:10.1007/s12104-026-10260-x), 2026-01-23
Supplement: MOESM1 [file 12104_2026_10260_MOESM1_ESM.pdf]

Supplementary Material for  $^1\text{H}$ ,  $^{13}\text{C}$  and  $^{15}\text{N}$  resonance assignments for human all-Ala  $\alpha$ -lactalbumin in its molten globule and urea-denatured states. Lorena Varela, Lorna J. Smith and Christina Redfield\*

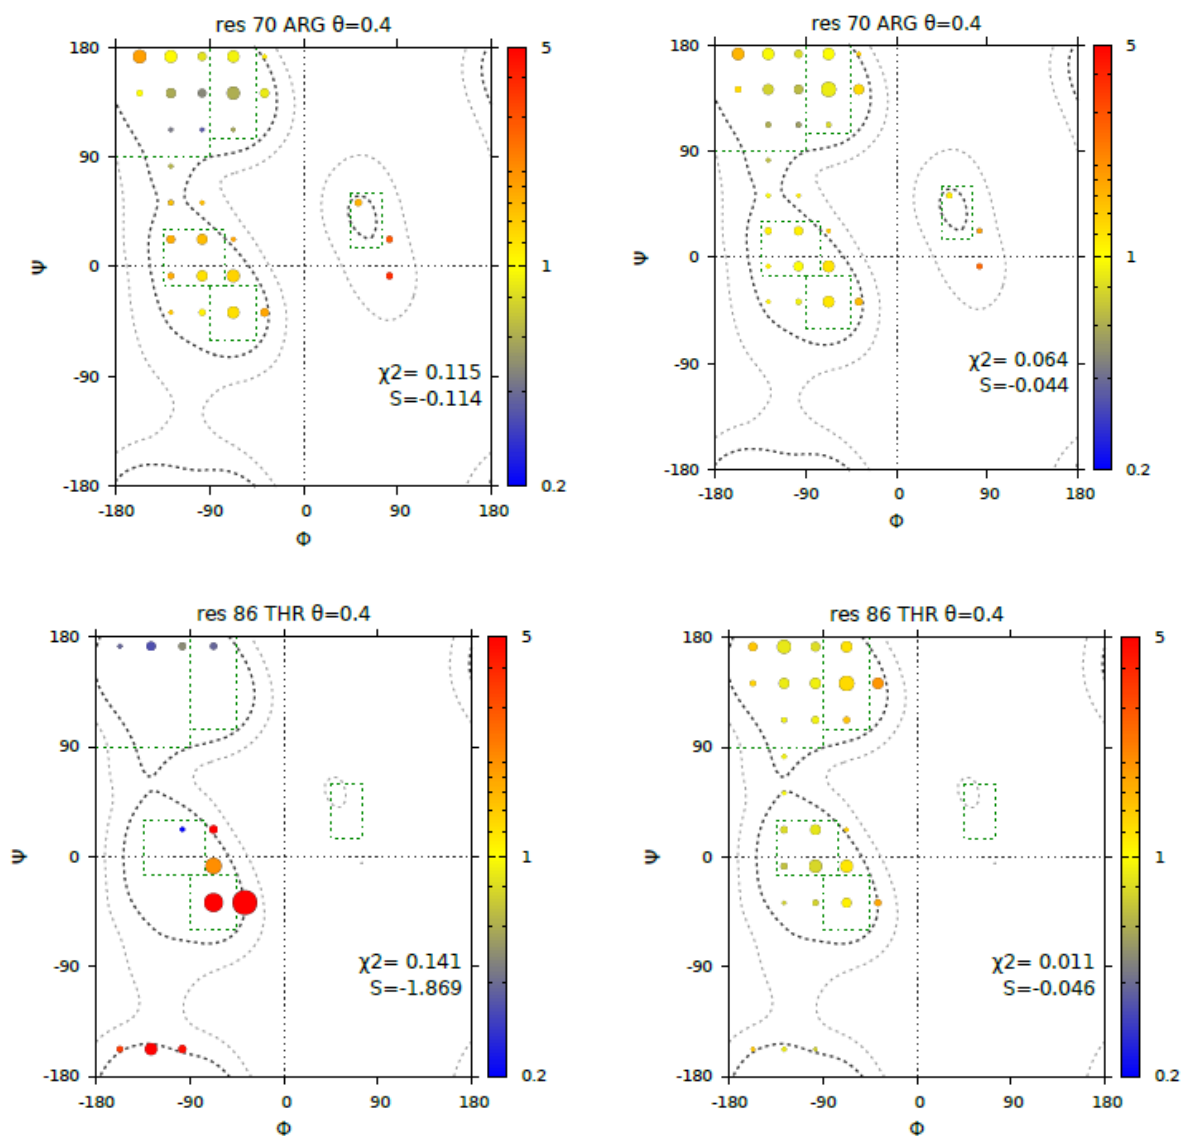

Figure S1

Comparison of the Ramachandran  $\phi, \psi$  plots for Arg 70 ( $\beta$ -domain) and Thr 86 ( $\alpha$ -domain) calculated using MERA with  $\theta=0.4$ . The left-hand panels are for the molten globule state and the right-hand panels are for the urea denatured state. The  $\phi, \psi$  populations are similar for Arg 70 in the molten globule and urea-denatured state but Thr 86 shows a much higher population of the  $\alpha$ -region in the molten globule compared to the urea-denatured state.
